# Supplementary material
Source: PubMed Central journal article supplement (PMC6953896)
Supplement: mmc1.pdf [file mmc1.pdf]

**YMTHE, Volume 28**

**Supplemental Information**

**Imaging CAR T Cell Trafficking  
with eDHFR as a PET Reporter Gene**

**Mark A. Sellmyer, Sarah A. Richman, Katheryn Lohith, Catherine Hou, Chi-Chang Weng, Robert H. Mach, Roddy S. O'Connor, Michael C. Milone, and Michael D. Farwell**

## **Imaging CAR T Cell Trafficking with eDHFR as a PET Reporter Gene**

Mark A. Sellmyer<sup>1,2†\*</sup>, Sarah A. Richman<sup>3†</sup>, Katheryn Lohith<sup>1</sup>, Catherine Hou<sup>1</sup>, Chi-Chang Weng<sup>1,4</sup>, Robert H. Mach<sup>1</sup>, Roddy S. O'Connor<sup>5</sup>, Michael C. Milone<sup>5</sup>, and Michael D. Farwell<sup>1\*</sup>

<sup>1</sup>Department of Radiology, University of Pennsylvania, Philadelphia, PA 19104, USA;

<sup>2</sup>Department of Biochemistry and Biophysics, University of Pennsylvania;

<sup>3</sup>Division of Oncology, Department of Pediatrics, Children's Hospital of Philadelphia and Perelman School of Medicine at the University of Pennsylvania;

<sup>4</sup>Department of Medical Imaging and Radiological Sciences, Chang Gung University, Taoyuan, Taiwan;

<sup>5</sup>Department of Pathology and Laboratory Medicine, University of Pennsylvania.

Short Title: CAR T cell PET reporter gene imaging

Keywords: CAR T Cells, reporter gene, molecular imaging

† Co-first authorship

\* Correspondence should be addressed to:

M.D.F. (michael.farwell@pennmedicine.upenn.edu) or

M.A.S. (mark.sellmyer@pennmedicine.upenn.edu)

<https://orcid.org/0000-0002-1407-1905>

Department of Radiology  
Perelman School of Medicine at the University of Pennsylvania  
813A Stellar-Chance Labs  
422 Curie Boulevard  
Philadelphia, PA  
19104-6059  
Phone: 215-573-3212

|         | eDHFR 116 |      | 10 $\mu$ M MTX |      | 10 $\mu$ M TMP |      |
|---------|-----------|------|----------------|------|----------------|------|
|         | Mean      | SD   | Mean           | SD   | Mean           | SD   |
| 5 min   | 14.3      | 1.87 | 17.2           | 1.03 | 5.82           | 1.1  |
| 30 min  | 47.2      | 1.84 | 30.4           | 1.29 | 6.66           | 0.48 |
| 60 min  | 87.1      | 4.82 | 18.8           | 1.84 | 7.04           | 0.7  |
| 120 min | 134.6     | 2.71 | 9.42           | 0.73 | 8.38           | 1.13 |

|         | Control 116 |      | 10 $\mu$ M MTX |      | 10 $\mu$ M TMP |      |
|---------|-------------|------|----------------|------|----------------|------|
|         | Mean        | SD   | Mean           | SD   | Mean           | SD   |
| 5 min   | 5.11        | 0.49 | 6.32           | 0.41 | 5.37           | 0.78 |
| 30 min  | 6.58        | 0.51 | 5.59           | 0.43 | 5.83           | 0.48 |
| 60 min  | 7.37        | 0.62 | 6.74           | 0.63 | 6.48           | 0.52 |
| 120 min | 8.4         | 0.52 | 8.62           | 0.66 | 7.61           | 0.33 |

**Figure S1.** Tabular evaluation of eDHFR and Control 116 [ $^{18}$ F]-TMP uptake with competitive inhibitors. Values displayed are in % Input / 100  $\mu$ g Protein (n=4).

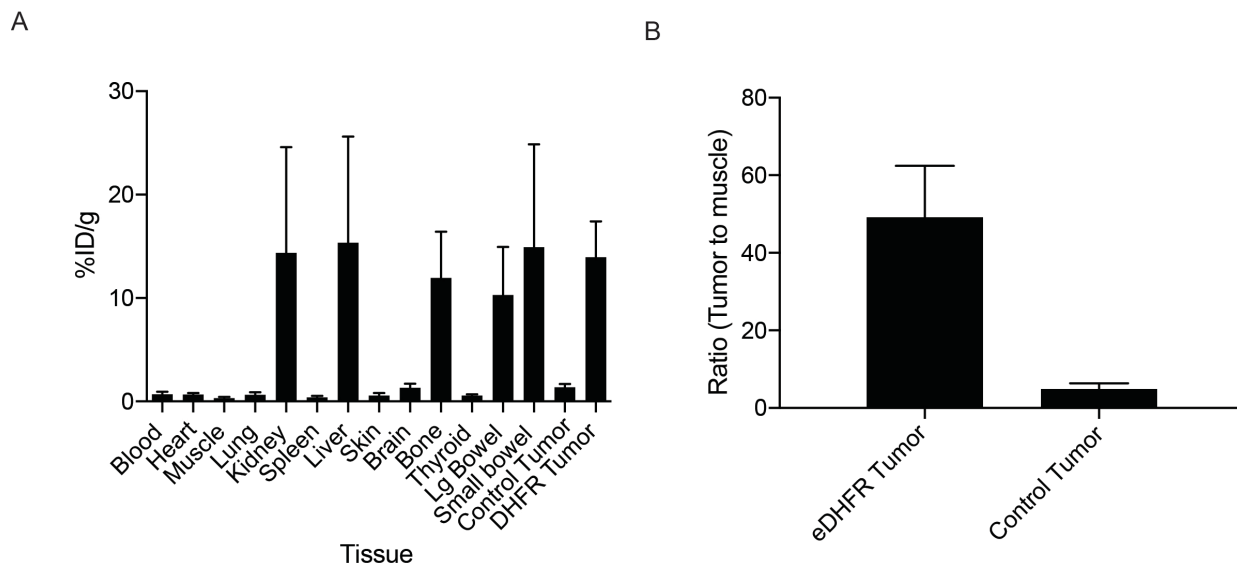

**Figure S2.** Ex vivo biodistribution of tissues including eDHFR and control HCT116 tumors. Mice were sacrificed at the completion of the PET/CT imaging session. **A)** Uptake in percent injected dose per gram (%ID/g) was assayed with a gamma counter (n=3). **B)** Ratio of tumor uptake to muscle (n=3). Error bars represent the standard deviation.

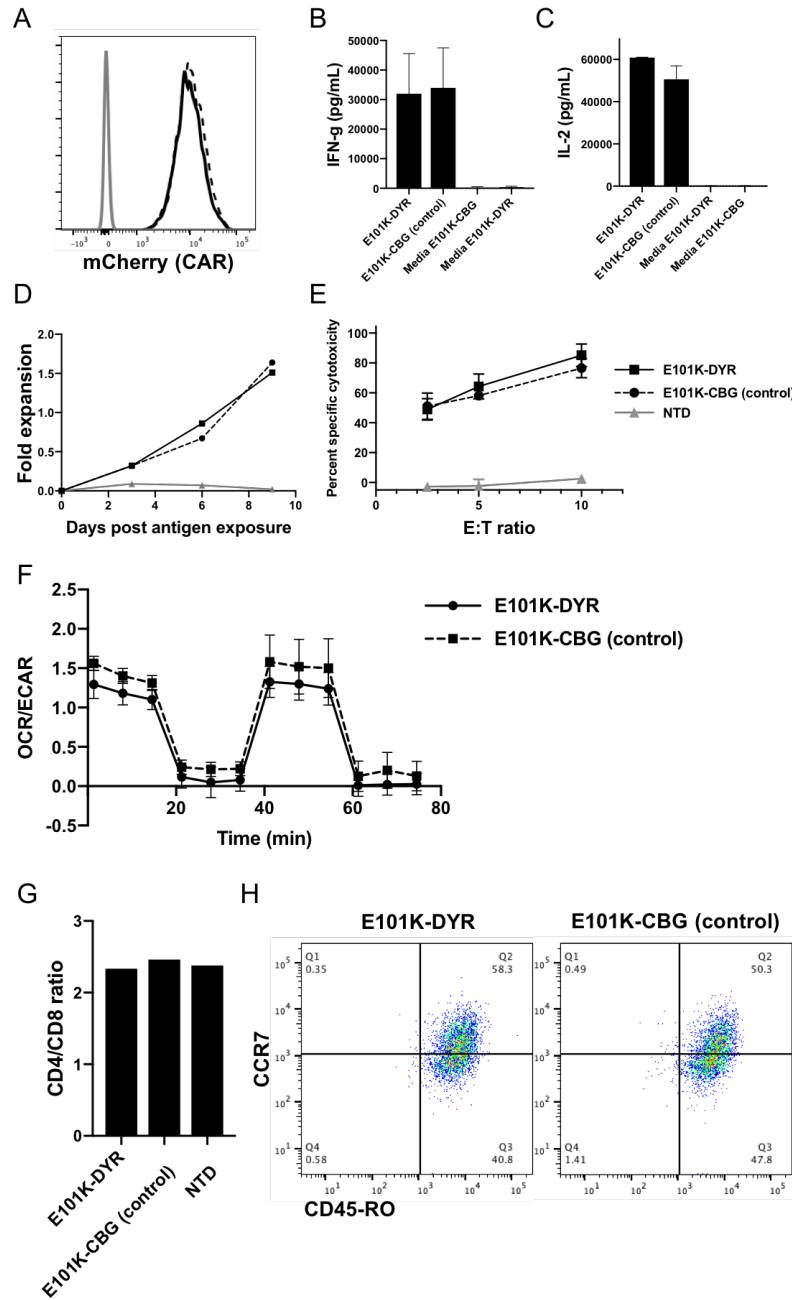

**Figure S3. In vitro effector function, metabolic profile, and subset profile of CAR-DYR T cells.** Sorted primary human T cells co-expressing the GD2-E101K CAR-T2A-mCherry and either DYR (E101K-DYR) or control construct consisting of GFP and click beetle green luciferase (E101K-CBG) were used in the following assays A) Flow cytometry comparing mCherry (CAR) expression of sorted cells prior to antigen exposure. Following exposure to GD2<sup>+</sup> SY5Y target cells, IL-2 and IFN- $\gamma$  secretion was determined by ELISA (B-C). Fold population expansion was determined by flow cytometric bead-based counting (D). Cytotoxicity was determined by <sup>51</sup>Cr release assay (E). Oxygen consumption rate (OCR) and extracellular acidification rate (ECAR) were

determined via Seahorse assay (F). The ratio of CD4<sup>+</sup> and CD8<sup>+</sup> T cells, as well as the proportion of CD45-RO<sup>+</sup>/CCR7<sup>+</sup> cells (central memory) was determined by flow cytometry. Data are from one T cell donor. Graphs show mean with error bars showing SD. Cytokine release and cytotoxicity assays were performed in triplicate. Seahorse assay was performed with 14 replicates for E101K-DYR and 10 replicates for E101K-CBG.

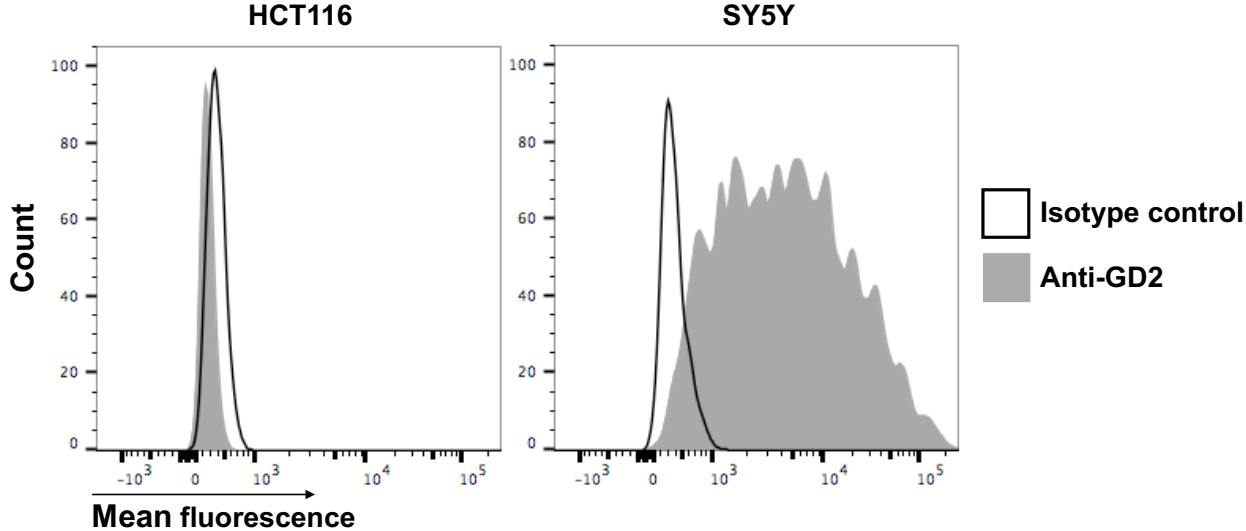

**Figure S4.** Analysis of GD2 expression on HCT116 and SY5Y cells with flow cytometry. HCT116 (left panel) and known GD2<sup>+</sup> positive SY5Y cells (right panel) were stained with APC isotype control or APC-anti-GD2 and analyzed by flow cytometry.

DYR-CAR M4

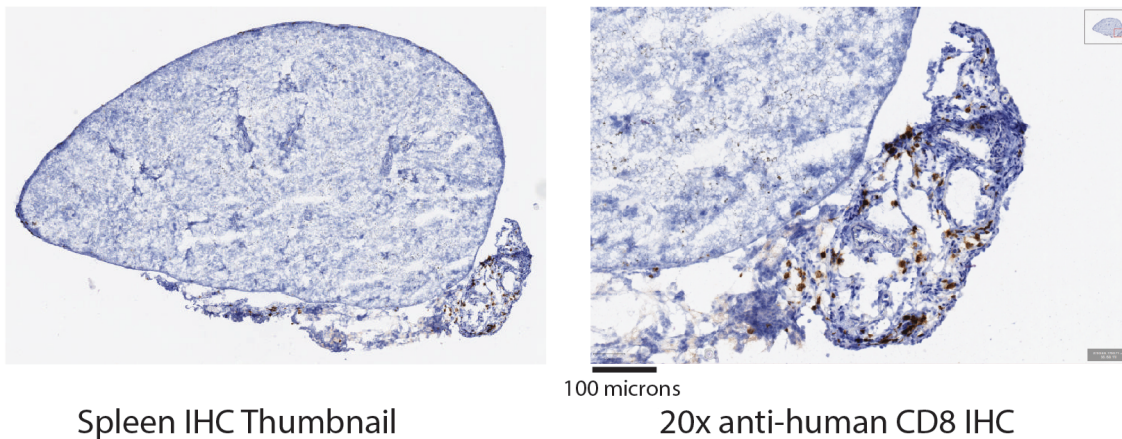

**Figure S5. DYR-CAR M4 spleen.** IHC was performed on the DYR-CAR M4 spleen for CD8 (see Figure 4 showing persistent PET signal from the M4 spleen on day 13). CD8 positive CAR T cells are present in the splenic periphery (20x).



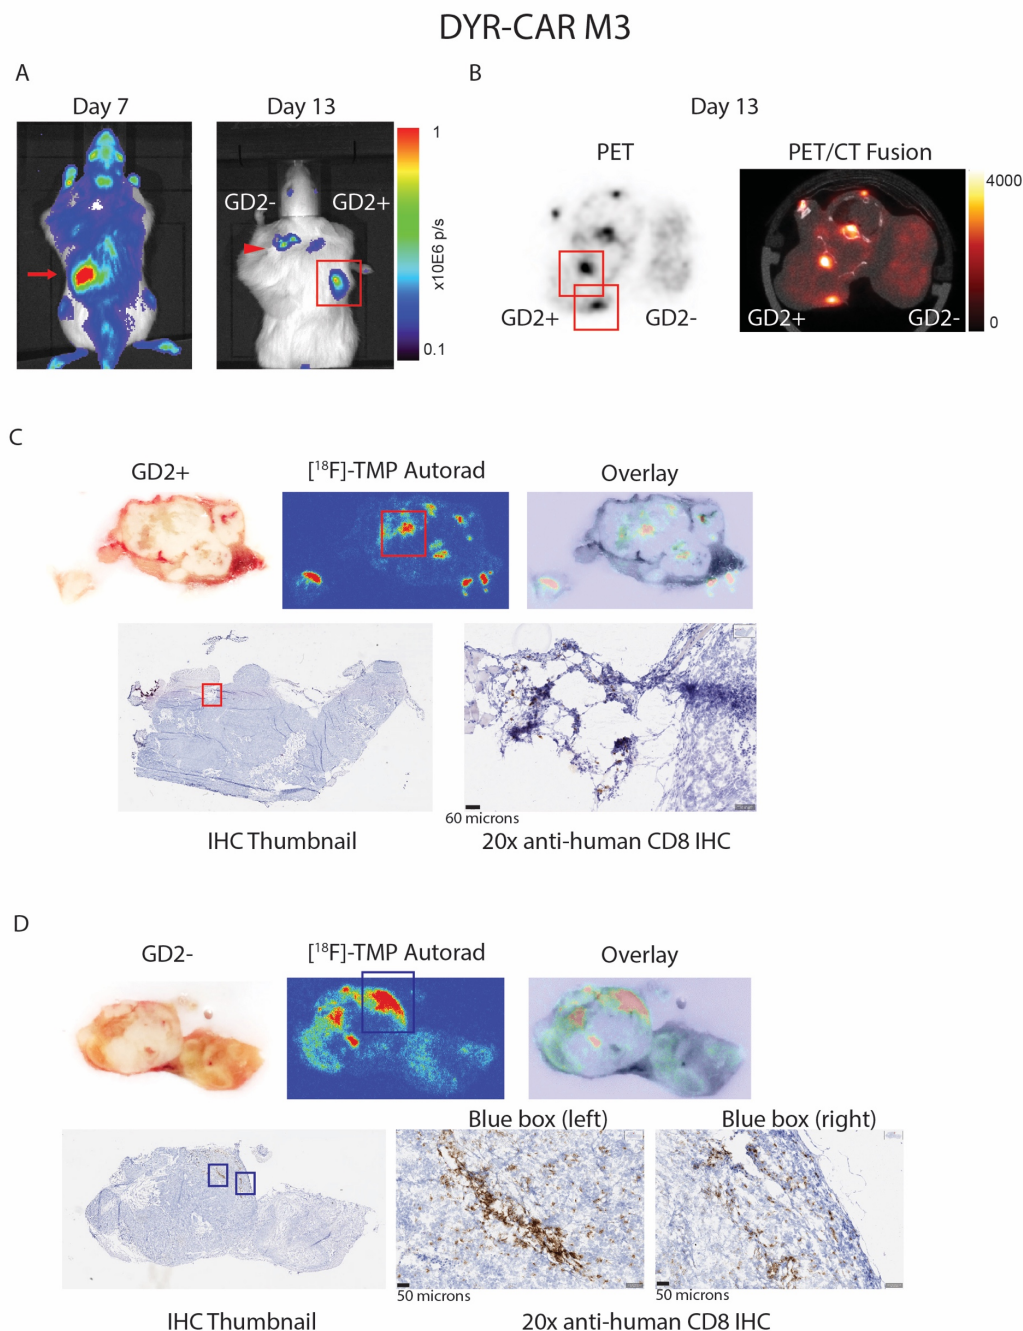

**Figure S6** BLI, PET/CT, autoradiography and IHC of DYR-CAR M3 tumors. **A)** BLI shows splenic signal on D7 that decreased by D13 (arrow). New foci appear on D13 in the tumors. The areas in the GD2<sup>+</sup> 143b tumor are highlighted by the red box while the areas in the GD2<sup>-</sup> HCT116 tumor are indicated with the arrowhead. **B)** PET/CT shows foci of uptake (red boxes) in the peripheral and medial areas of the GD2<sup>+</sup> tumor and low level of generalized uptake in the GD2<sup>-</sup> tumor. **C)** Autoradiography of a section of the GD2<sup>+</sup> 143b tumor shows scattered areas of uptake and one area of radiosignal that correlates with CD8 IHC (red boxes). **D)** Autoradiography of a section of the GD2<sup>-</sup> tumor shows an area of peripheral uptake that correlates with CD8 IHC (large blue box). The small blue boxes are 20x zoom of the areas on the thumbnail image.

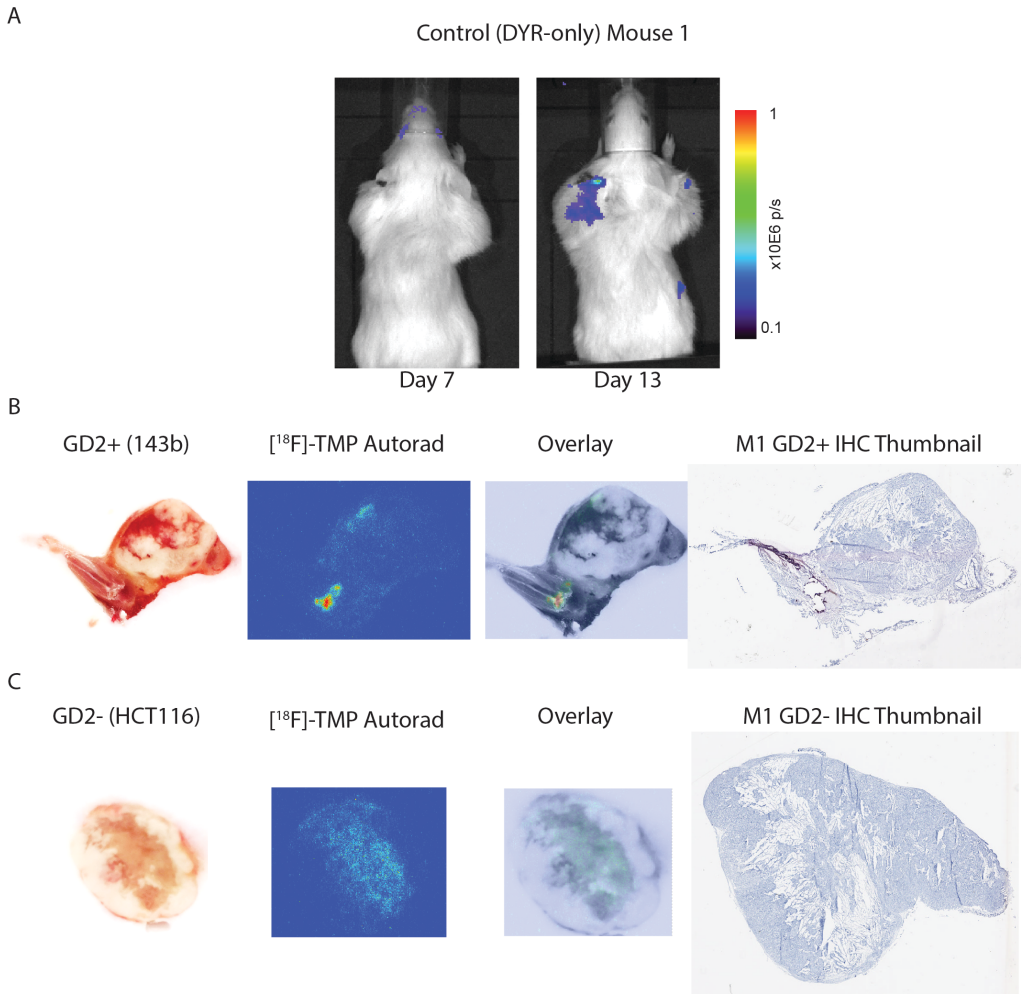

**Figure S7.** BLI, autoradiography and IHC of Control M1 tumors. **A)** BLI shows foci of signal overlying the HCT116 tumor (GD2<sup>-</sup>). **B)** Autoradiography of the 143b tumor shows scattered areas of uptake overlying the bone of the upper arm. There were no CD8 positive T cells on IHC. **C)** The HCT116 tumor did not show any specific signal on auto-radiography and there were no CD8 positive T cells on IHC.

# HLA peptide motif search results

## HSV-tk

```

1      MASHAGQQHA PAFGQAARAS GPTDGRAASR PSHRQGASEA RGDPELPTLL
51     RVIYIDGPHGV GKTTTSAQLM EALGPRDNIV YVPEPMTYWQ VLGASETLTN
101    IYNTQHRLLDR GEISAGEAAV VM TSAQITMS TPYAATDAVL APHIGGEAVG
151    PQAPPALTL VFDRHPIASL LCYPAARYLM GNMTPQAVLA FVALMPPTAP
201    GTNLVLGVLP EAHADRLAR RQRPGARLDL AMLSAIRRVY DLLANTVRYL
251    QRGGRWREDW GRLTGVA AAT PRDPEDGAG SLPRIEDTLF ALFRVPELLA
301    PNGDLYHIFA WVLDVLADRL LPMHLFVLDY DQSPVGRDA LLRLTAGMIP
351    TRVTTAGSIA EIRDLARTFA REVGGV

```

| User Parameters and Scoring Information                                  |                 |
|--------------------------------------------------------------------------|-----------------|
| method selected to limit number of results                               | explicit number |
| number of results requested                                              | 20              |
| HLA molecule type selected                                               | A1              |
| length selected for subsequences to be scored                            | 9               |
| echoing mode selected for input sequence                                 | Y               |
| echoing format                                                           | numbered lines  |
| length of user's input peptide sequence                                  | 376             |
| number of subsequence scores calculated                                  | 368             |
| number of top-scoring subsequences reported back in scoring output table | 20              |

| Scoring Results |                |                             |                                                                                           |
|-----------------|----------------|-----------------------------|-------------------------------------------------------------------------------------------|
| Rank            | Start Position | Subsequence Residue Listing | Score (Estimate of Half Time of Disassociation of a Molecule Containing This Subsequence) |
| 1               | 94             | ASETLTNIY                   | 67.500                                                                                    |
| 2               | 359            | IAEIRDLAR                   | 45.000                                                                                    |
| 3               | 43             | DPELPTLLR                   | 11.250                                                                                    |
| 4               | 298            | LLAPNGDLY                   | 5.000                                                                                     |
| 5               | 209            | LPEAEHADR                   | 4.500                                                                                     |
| 6               | 82             | VPEPMTYWQ                   | 4.500                                                                                     |
| 7               | 284            | RIEDTLFAL                   | 4.500                                                                                     |
| 8               | 227            | RLDLAMLSA                   | 2.500                                                                                     |
| 9               | 22             | PTDGRAASR                   | 2.500                                                                                     |
| 10              | 41             | RGDPELPTL                   | 2.500                                                                                     |
| 11              | 135            | ATDAVLAPH                   | 2.500                                                                                     |
| 12              | 80             | VYVPEPMTY                   | 1.250                                                                                     |

|    |     |           |       |
|----|-----|-----------|-------|
| 13 | 272 | RPDPEDGAG | 1.250 |
| 14 | 183 | MTPQAVLAF | 1.250 |
| 15 | 170 | LLCYPAARY | 1.000 |
| 16 | 241 | DLLANTVRY | 1.000 |
| 17 | 211 | EAEHADRLA | 0.900 |
| 18 | 165 | HPIASLLCY | 0.625 |
| 19 | 302 | NGDLYHIFA | 0.625 |
| 20 | 53  | YIDGPHGVG | 0.500 |

**eDHFR**

```

1      MISLIAALAV DRVIGMENAM PWNLPADLAW FKRNTLNKPV IMGRHTWESI
51     GRPLPGRKNI ILSSQPGTDD RVTWVKSVD E AIAACGDVPE IMVIGGGRVY
101    EQFLPKAQKL YLTHIDAEVE GDTHFPDYEP DDWESVVFSEF HDADAQNSHS
151    YCFEILERR

```

| <b>User Parameters and Scoring Information</b>                           |                 |
|--------------------------------------------------------------------------|-----------------|
| method selected to limit number of results                               | explicit number |
| number of results requested                                              | 20              |
| HLA molecule type selected                                               | A1              |
| length selected for subsequences to be scored                            | 9               |
| echoing mode selected for input sequence                                 | Y               |
| echoing format                                                           | numbered lines  |
| length of user's input peptide sequence                                  | 159             |
| number of subsequence scores calculated                                  | 151             |
| number of top-scoring subsequences reported back in scoring output table | 20              |

| <b>Scoring Results</b> |                       |                                    |                                                                                                  |
|------------------------|-----------------------|------------------------------------|--------------------------------------------------------------------------------------------------|
| <b>Rank</b>            | <b>Start Position</b> | <b>Subsequence Residue Listing</b> | <b>Score (Estimate of Half Time of Disassociation of a Molecule Containing This Subsequence)</b> |
| 1                      | 120                   | EGDTHFPDY                          | 12.500                                                                                           |
| 2                      | 137                   | FSEFHDADA                          | 2.700                                                                                            |
| 3                      | 25                    | PADLAWFKR                          | 2.500                                                                                            |
| 4                      | 63                    | SSQPGTDDR                          | 1.500                                                                                            |
| 5                      | 129                   | EPDDWESVF                          | 1.250                                                                                            |
| 6                      | 67                    | GTDDRVTWV                          | 1.250                                                                                            |

|    |     |           |       |
|----|-----|-----------|-------|
| 7  | 88  | VPEIMVIGG | 1.125 |
| 8  | 77  | SVDEAIAAC | 1.000 |
| 9  | 98  | RVYEQFLPK | 1.000 |
| 10 | 116 | DAEVEGDTH | 0.900 |
| 11 | 15  | GMENAMPWN | 0.900 |
| 12 | 85  | CGDVPEIMV | 0.625 |
| 13 | 142 | DADAQNSHS | 0.500 |
| 14 | 92  | MVIGGGRVY | 0.500 |
| 15 | 18  | NAMPWNLPA | 0.500 |
| 16 | 132 | DWESVFSEF | 0.450 |
| 17 | 127 | DYEPDDWES | 0.450 |
| 18 | 4   | LIAALAVDR | 0.200 |
| 19 | 23  | NLPADLAWF | 0.200 |
| 20 | 36  | LNKPVIMGR | 0.125 |

**Figure S8.** Predicted half-time of dissociation to HLA class one molecules.

*Ref: Parker, K. C., M. A. Bednarek, and J. E. Coligan. 1994. Scheme for ranking potential HLA-A2 binding peptides based on independent binding of individual peptide side-chains. J. Immunol. 152:163.*

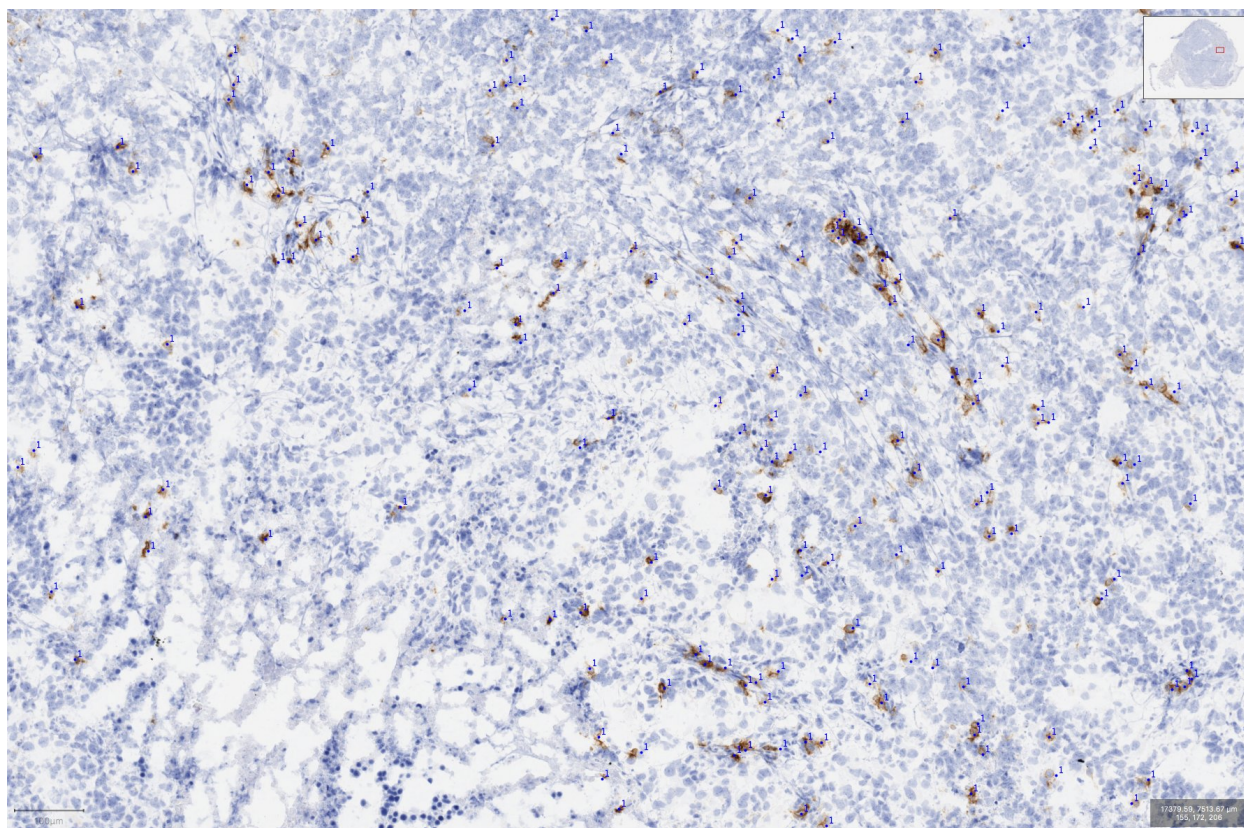

----- (100  $\mu\text{m}$ )

**Figure S9.** Estimation of cellular density where PET signal can be determined. CD8 DYR-CAR T-cells were counted on a medium power field (10x). There are 200 cells counted (Software: Image J).

The result for calculating the volume in cu millimeters ( $\text{mm}^3$ ) of a rectangular box shape, with a length of 1.65 millimeters (mm), a width (thickness) of 10 micrometers ( $\mu\text{m}$ ) and a height of 1.1 millimeters (mm) is  $0.01815 \text{ mm}^3$ . Thus per  $\text{mm}^3$  the number of cells needed for micro PET/CT detection is approximately  $(1/0.01815)*200 = (55.1)*200 = 11,000$  cells per  $\text{mm}^3$ .

## DYR Gene Sequence:

Ggatcc(BamHI)ATGATAAGTTTGATTGCTGCTCTGGCTGTGGACCGGGTAATCGGTATGGAA  
AACGCCATGCCCTGGAACCTGCCTGCCGATTTGGCTTGGTTCAAGCGCAATACCCTGAAC  
AAACCAGTAATCATGGGAAGGCATACATGGGAAAGCATTGGAAGACCACTTCCCGGTAGA  
AAGAATATTATCCTGTCTAGCCAGCCCCGGCACGGATGATAGGGTGACATGGGTAAGAGC  
GTCGATGAGGCGATTGCGGCGTGTGGTGACGTGCCGAAATTATGGTTATCGGAGGCGG  
CAGGGTCTACGAACAGTTCCTGCCGAAGGCACAGAAGCTGTACCTCACCCACATCGATGC  
AGAGGTGGAAGGAGACACGCACTTTCCAGATTACGAGCCTGATGACTGGGAGAGTGT  
TAGCGAATTCATGACGCAGACGCCAAAACCTCTCACTCCTACTGCTTTGAGATTCTCGAA  
CGAAGGgcatgcgtgagcaagggcgaggagctgtcaccggggtggtgccatcctggtcagctggacggcgacgtaaacg  
gccacaagttcagcgtgtccggcgagggcgagggcgatgccacctacggcaagctgaccctgaagttcatctgcaccaccggca  
gctgcccggtgccctggcccaccctcgtgaccacctcggctacggcctgcagtgcttcccccgtaccccgaccacatgaagcagca  
cgactctcaagtcgcatgccgaaggctacgtccaggagcgcacctcttcaaggacgacggcaactacaagaccgcg  
ccgaggtgaagttcgagggcgacacctggtgaaccgcatcgagctgaagggcatcgactcaaggaggacggcaacatcctgg  
ggcacaagctggagtacaactacaacagccacaacgtctatatcatggccgacaagcagaagaacggcatcaaggtgaactca  
agatccgccacaacatcgaggacggcagcgtgcagctcggaccactaccagcagaacacccccatcggcgacggccccgtg  
ctgctgccgacaaccactacctgagctaccagtcggccctgagcaaaagacccaacgagaagcgcgatcacatggtcctgctgg  
agttcgtgaccgcccgggatcactctcggcatggacgagctgtacaagGCAGCGGAGAGGGGCAGAGGAAGT  
CTTCTAACATGCGGTGACGTGGAGGAGAATCCCGGCCCTgctagcacttcgaaagtttatgatccagaac  
aaaggaaacggatgataactggtccgcagtggtggccagatgaaacaaatgaatgttctgattcatttattaattattatgattcaga  
aaaacatgcagaaaatgctgtattttttacatggttaacgcccctctcttattatggcgacatggtgtccacatattgagccagtagc  
gcggtgtattataaccagacctattggtatgggcaaatcaggcaaatctggttaatggttctataggttactgtatcattacaataatctact  
gcatggttgaacttctaatttaccaaagaagatcttttgcggccatgattggggtgctgtttggcatttcattatagctatgacatcaa  
gataagatcaaagcaatagttcacgctgaaagtgtagtagtgattgaatcatgggatgaatggcctgatattgaagaagatattgc  
gtgatcaaatctgaagaaggagaaaaaatggtttggagaataacttctcgtggaaacatggtccatcaaaaatcatgagaaagt  
tagaaccagaagaattgcagcatactgaaccattcaagagaaaggtgaagttcgtcgtccaacattatcatggcctcgtgaaatc  
ccgtagtaaaaggtggtaaacctgacgtgtgtaaaattgtaggaattataatgcttactcagtgcaagtgatgattaccaaaaatggtt  
attgaatcggaccagattctttccaatgctattggtgaaggtgccaagaagttcctaataactgaatttgcaaaagtaaaaggtcttcat  
tttcgcaagaagatgcacctgatgaaatgggaaaatatacaaatcgttcgttgagcaggttctcaaaaatgaacaataaGTGCAC  
(Sall)

## DYR Protein Sequence:

MISLIAALAVDRVIGMENAMPWNLPADLAWFKRNTLNKPVIMGRHTWESIGRPLPGRKNIILSSQ  
PGTDDRVTWVKSVDIAIACGDVPEIMVIGGGRVYEQLPKAQKLYLTHIDAEVEGDTHFPDYE  
PDDWESVFSEFHDADAQNSHSYCFEILERRACVSKGEELFTGVVPILVELDGDVNGHKFSVSG  
EGEGDATYGKLTLLKFICTTGKLPVPWPTLVTTFGYGLQCFARYPDHMKQHDFFKSAMPEGYV  
QERTIFFKDDGNYKTRAEVKFEGLTLVNRIELKGIDFKEDGNILGHKLEYNYNSHNVYIMADKQK  
NGIKVNFKIRHNIEDGSQLADHYQQNTPIGDGPVLLPDNHLYSYQSALS KDPNEKRDHMLLE  
FVTAAGITLGMDELKGSSEGRGSLTTCGDVEENPGPASTSKVYDPEQRKRMITGPQWWARC  
KQMNVLDSFINYYDSEKHAENAVIFLHGNAASSYLWRHVPHIEPVARCIIPDLIGMGKSGKSG  
NGSYRLLDHYKYLTAWFELLNLPKKIIFVGHWDWGAFLAFHYSYEHQDKIKAIVHAESVVDVIESW  
DEWPDIEEDIALIKSEEKGMVLENNFFVETMLPSKIMRKEPEEFAAYLEPFKEKGEVRRPTLS  
WPREIPLVKGGKPDVVQIVRNYNAYLRASDDLPMFIESDPGFFSNAIVEGAKKFPNTEFVKVK  
GLHFSQEDAPDEMGGYIKSFVERVLKNEQ
